# Supplementary material
Source: PubMed Central journal article supplement (PMC7162254)
Supplement: CMI-11-1533-s002.pdf [file CMI-11-1533-s002.pdf]

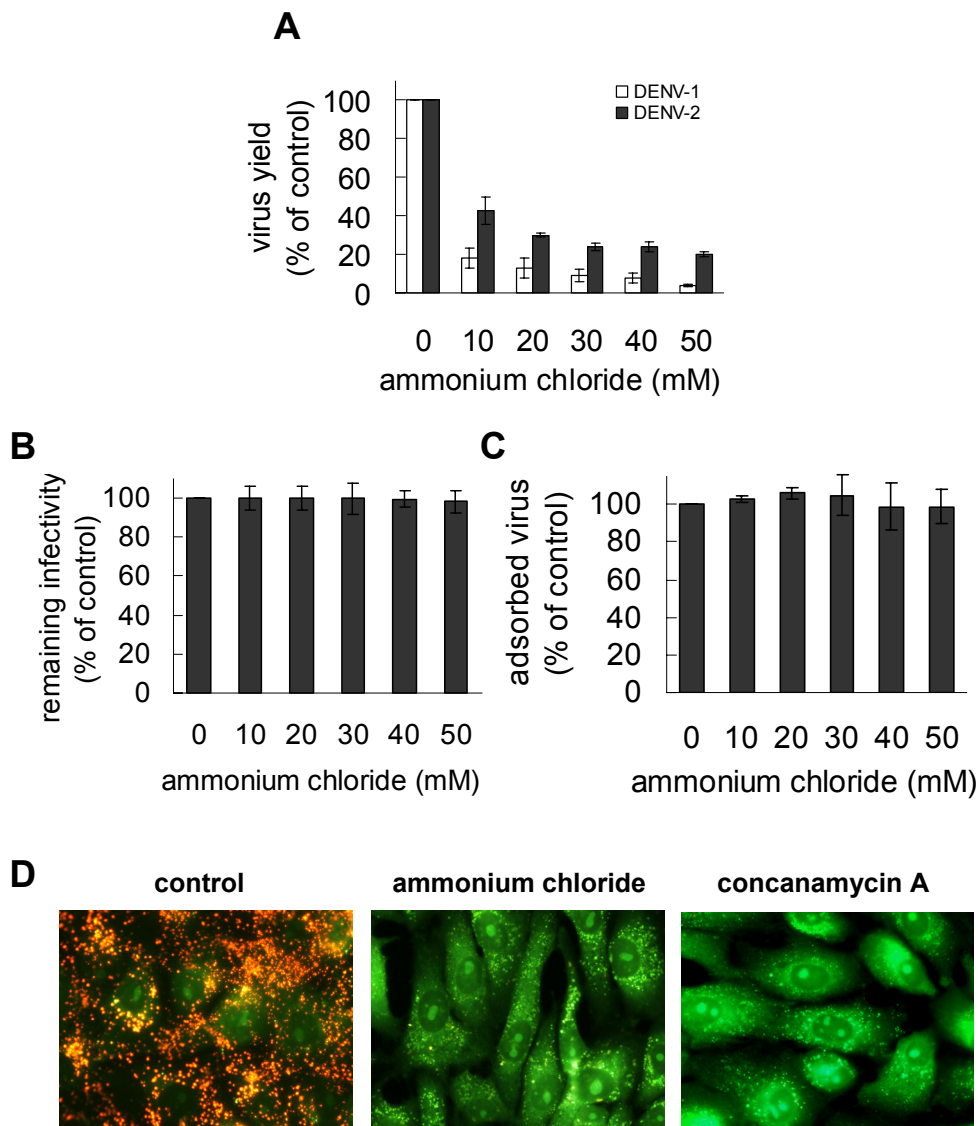

**Fig. S1.** Effect of ammonium chloride on DENV multiplication, viral particles infectivity, virus adsorption and intracellular vesicle acidification. A. Cells were treated with increasing concentrations of ammonium chloride and infected with DENV-1 or DENV-2. Virus yields were quantified by plaque assay at 48 h p.i. B. Suspensions of DENV-2 virions were incubated at 37 °C with various concentrations of ammonium chloride. After 1 h samples were diluted and remaining infectivity was determined by plaque formation assay. C. Vero cells were treated as in A and infected with DENV-2 at 4 °C. After 1 h adsorption in the presence or absence of the drug cells were disrupted and cell-bound virus was determined by plaque formation assay. In A, B and C Results are expressed as percentage of virus multiplication with respect to a control without drug treatment. Each point shows the mean of two independent experiments  $\pm$  SD. D. Cells were left untreated (control) or treated with 50 mM ammonium chloride or 50 nM concanamycin A. Then, samples were stained with acridine orange.

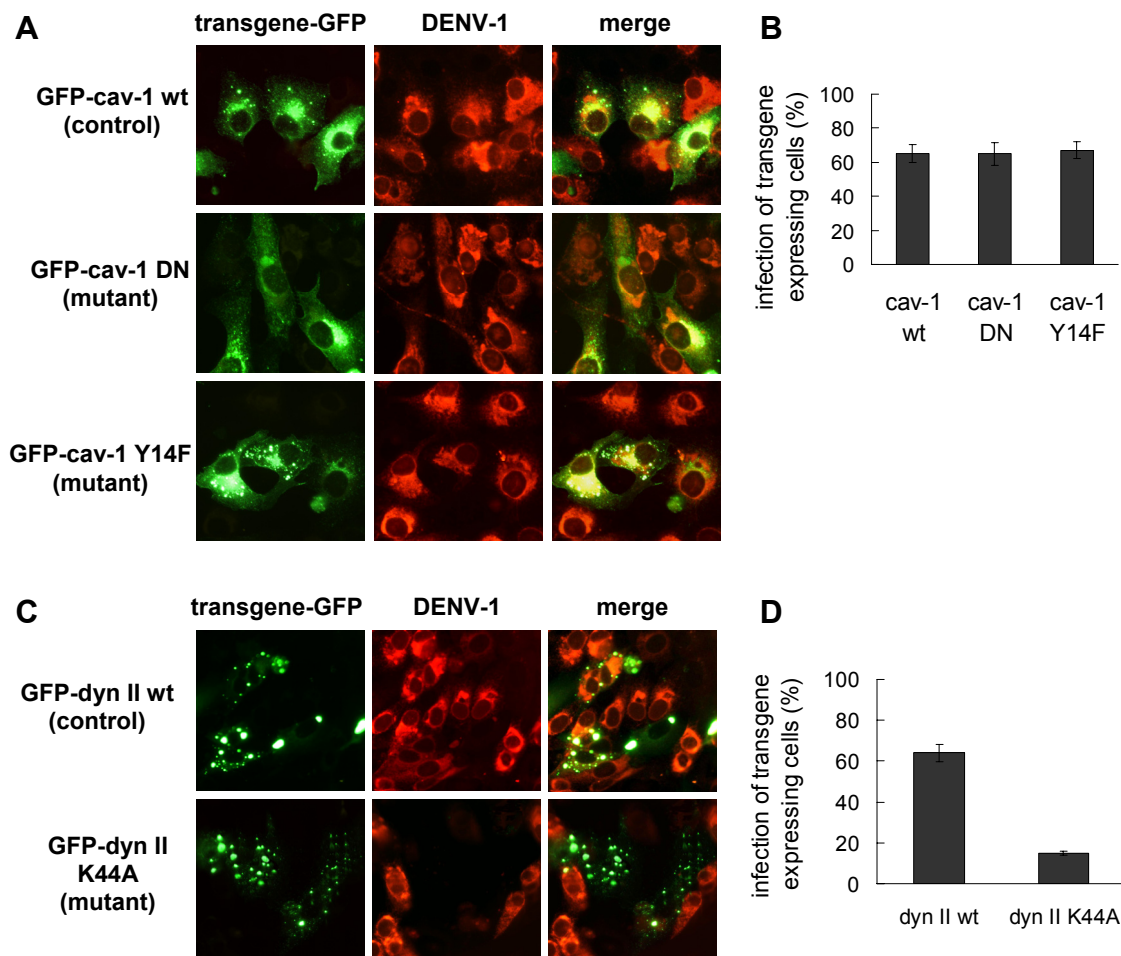

**Fig. S2.** DENV-1 infection of Vero cells is independent of caveolae but dependent on dynamin. **A** Cells transiently transfected with the constructs GFP-cav-1 wt, GFP cav-1 DN or GFP-cav-1 Y14F were infected with DENV-1. After 24 h infection cultures were fixed and immunofluorescence staining was performed. **B.** For quantification of samples shown in panel A, 250 transfected cells with similar levels of GFP expression were screened and cells positive for viral antigen were scored. **C.** Cells transiently transfected with the constructs GFP-dyn II wt or GFP-dyn II K44A were infected with DENV-1. After 24 h infection cultures were fixed and immunofluorescence staining was performed. **D.** For quantification of samples shown in panel C, 250 transfected cells with similar levels of GFP expression were screened and cells positive for viral antigen were scored. In B and D results are expressed as the mean of two independent experiments  $\pm$  SD.

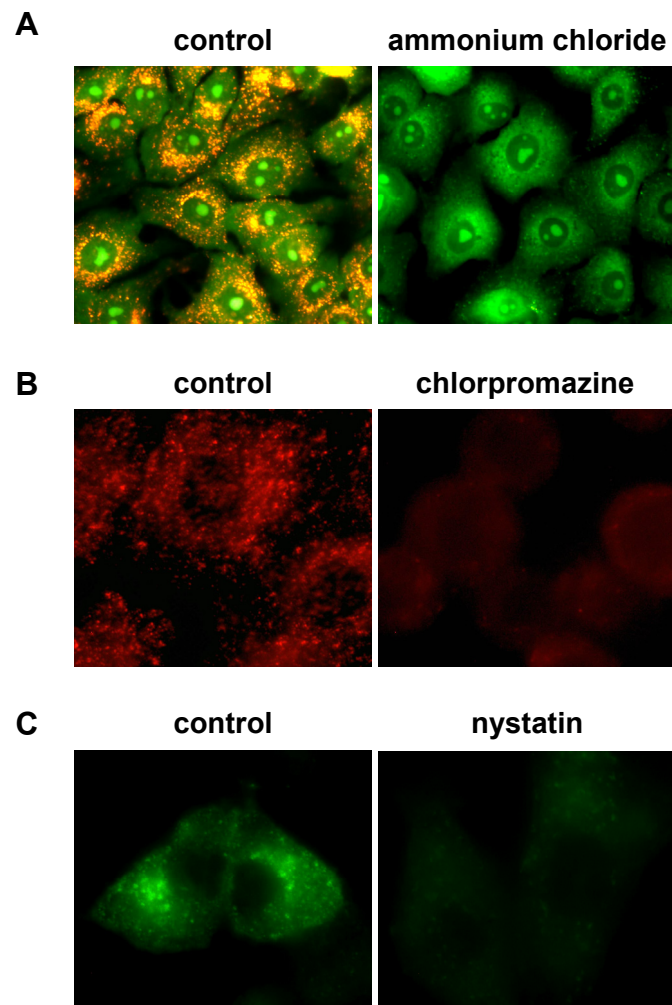

**Fig. S3.** Effect of different inhibitors on A549 cells endocytic processes. A549 cells were left untreated (control) or treated with ammonium chloride 50 mM (A), chlorpromazine 50  $\mu$ M (B) or nystatin 100  $\mu$ M (C). Then cells were stained with acridine orange (A), or incubated with TRITC-labelled transferrin (B) or FITC-labelled cholera toxin (C).
